# Supplementary material for: Unveiling of the novel benzothiazole derived thiazolidinone derivatives: in vitro and in silico insights to design a promising agent for anti-Alzheimer’s disease
Source: publisher site journal article supplement (doi:10.1515/znc-2024-0244), 2025-06-23
Supplement: Supplementary file 1 [file j_znc-2024-0244_suppl_001.docx]

**Unveiling of the novel benzothiazole derived thiazolidinone derivatives: In vitro and in silico insights to design a promising agent for anti-Alzheimer’s disease**

Yousaf Khan1, Anila Mukhtiar1, Hina Sarfraz1, Shoaib Khan2, Rafaqat Hussain3, Mujeeb Ul Naeem4, Abdul Sattar1, Tariq Aziz5, Zia Ur Rehman Panezai6,Abdullah F Alasmari7, Farwa Jabbir8

*1 Department of Chemistry, COMSATS University Islamabad campus-45550, Islamabad, Pakistan.*

*2 Department of Chemistry, Abbottabad University of Science and Technology, Abbottabad, Pakistan.*

*3 Department of Chemsitry, Hazara University Mansehra, Pakistan*

*4* *Life Sciences Department, Abasyn University, Islamabad, Pakistan.*

*5 Laboratory of Animal Health Food Hygiene and Quality, Department of Agriculture University of Ioannina Arta 47132 Greece*

*6 Department of Environmental Sciences, Baluchistan University of Science and Technology Engineering & Management Sciences, Quetta, Baluchistan, Pakistan.*

*7 Department of Pharmacology and Toxicology, College of Pharmacy, King Saud University Riyadh Saudi Arabia*

*8 Department of Biotechnology, University of Sarghoda, Punjab Pakistan*

*****Correspondence: [yousaf7n@gmail.com](mailto:yousaf7n@gmail.com) (Y.K)

**Figure I-1**. SAR of compound**-3** against AChE and BuChE

**Figure I-2**. SAR of compound**-4** against AChE and BuChE

**Figure I-3**. SAR of compound**-5** against AChE and BuChE

**Figure I-4**. SAR of compound**-7** against AChE and BuChE

**Figure I-5**. SAR of compound**-14** against AChE and BuChE

**Figure I-6**. SAR of compound**-1** against AChE and BuChE

**S1. Docking Protocol**

Molecular docking analysis was performed to elucidate the binding interactions between thiazolidinone based thiadiazole scaffold (**1-16**) and the active residues of acetylcholinesterase (AChE) and butyrylcholinesterase (BChE) using AutoDock. The initial structural geometries of **Acetylcholinesterase (PDB ID 4BDT)** and **Butyrylcholinesterase (PDB ID 5LKR)** were obtained from the RCSB Protein Data Bank. The co-crystallized receptor-ligand complexes were utilized to identify the active binding sites of both enzymes, ensuring precise docking simulations. To validate the docking protocol, a re-docking experiment was performed using donepezil as a reference ligand, which successfully reproduced its binding pose within the active site. The resulting root mean square deviation (RMSD) value of 0.63 Å confirmed the accuracy and reliability of the docking methodology. This was accomplished using the Merck Molecular Force Field 94 (MMFF94) at level 44. The PDB files generated from MMFF94 optimizations were subsequently used to refine the molecular geometries of the synthesized derivatives. To predict the binding affinities and preferred conformations of the original ligand and its structurally modified derivatives, the Lamarckian Genetic Algorithm (LGA) was employed, with a total of 500 independent docking runs. This approach enabled a comprehensive exploration of potential ligand-receptor interactions, facilitating a deeper understanding of their inhibitory potential against AChE and BChE.

**S2. ADMET Prediction Profile of Synthesized Analogues**

A key objective of this study was to evaluate the **Absorption, Distribution, Metabolism, Excretion, and Toxicity (ADMET)** properties of the synthesized drug compounds, following the methodology reported outlined protocols. The pharmacokinetic and toxicity assessments were conducted for analogues **3, 4, 5, and 7** providing valuable insights into their drug-like characteristics. The results of these analyses, encompassing all ADMET parameters, are visually represented in **Table-3**, offering a comprehensive overview of their predicted pharmacological behavior.

**References**

1. Khan, Y.; Iqbal, S.; Shah, M.; Maalik, A.; Hussain, R.; Khan, S.; Khan, I.; Pashameah, R.A.; Alzahrani, E.; Farouk, A.E.; Alahmdi, M.I. New quinoline-based triazole hybrid analogs as effective inhibitors of α-amylase and α-glucosidase: Preparation, in vitro evaluation, and molecular docking along with in silico studies*. Frontiers in Chemistry*. **2022**, 10, 995820.
2. Khan, Y.; Rehman, W.; Hussain, R.; Khan, S.; Malik, A.; Khan, M.; Liaqat, A.; Rasheed, L.; Begum, F.; Fazil, S.; Khan, I. New biologically potent benzimidazole‐based‐triazole derivatives as acetylcholinesterase and butyrylcholinesterase inhibitors along with molecular docking study. *Journal of Heterocyclic Chemistry*. **2022**, 59, 2225–2239.
3. Khan, S.; Rehman, W.; Rahim, F.; Hussain, R.; Obaidullah, A.*J*.; Alotaibi, H.F.; Alanazi, M.M.; Khan, M.U.; Khan, Y. Bis-indole based triazine derivatives: Synthesis, characterization, in vitro β-glucuronidase anti-cancer and anti-bacterial evaluation along with in silico molecular docking and ADME analysis. *Arabian Journal of Chemistry*, **2023**, 16(8), 104970.
4. Anwar, S.; Rehman, W.; Hussain, R.; Khan, S.; Alanazi, M.M.; Alsaif, N.A.; Khan, Y.; Iqbal, S.; Naz, A.; Hashmi, M.A. Investigation of Novel Benzoxazole-Oxadiazole Derivatives as Effective Anti-Alzheimer’s Agents: In Vitro and In Silico Approaches. *Pharmaceuticals.* **2023**, 16(7), 909.
